# Supplementary material for: Complex N acquisition by soil diazotrophs: how the ability to release exoenzymes affects N fixation by terrestrial free-living diazotrophs
Source: PubMed Central journal article supplement (PMC5270568; doi:10.1038/ismej.2016.127), 2016-11-29
Supplement: ismej2016127x1.pdf [file ismej2016127x1.pdf]

Supplemental Table 1. Genomic evidence for extracellular deamination by free-living soil diazotrophs. SignalP scores are values between 0 and 1 that indicate the likelihood of the presence of a signal peptide in an amino acid sequence. Signal P scores greater than 0.42 were used to indicate the presence of a signal peptide in gram-positive bacteria. We found no genomic evidence for extracellular deamination by *Clostridium acetobutylicum* (ATCC 9039) or *Clostridium pasteurianum* (ATCC 6013), which are therefore not listed in this table.

| <b>Genome searched</b>                 | <b>NCBI Ref. seq.</b> | <b>SignalP score</b> | <b>Annotation</b>    |
|----------------------------------------|-----------------------|----------------------|----------------------|
| <i>Paenibacillus beijingensis</i> 7188 | WP_045670562.1        | 0.871                | copper amine oxidase |
|                                        | WP_045671836.1        | 0.543                | copper amine oxidase |
|                                        | WP_045672389.1        | 0.689                | copper amine oxidase |
|                                        | WP_045673106.1        | 0.710                | copper amine oxidase |
| <i>Paenibacillus sabiniae</i> T27      | WP_025333104.1        | 0.771                | copper amine oxidase |
|                                        | WP_025334629.1        | 0.625                | copper amine oxidase |
|                                        | WP_025334738.1        | 0.764                | copper amine oxidase |
| <i>Paenibacillus terrae</i> HPL-003    | WP_014278449.1        | 0.688                | copper amine oxidase |
|                                        | WP_014278450.1        | 0.438                | copper amine oxidase |
|                                        | WP_014278514.1        | 0.567                | copper amine oxidase |
|                                        | WP_014278677.1        | 0.704                | copper amine oxidase |
|                                        | WP_014279290.1        | 0.720                | copper amine oxidase |
|                                        | WP_014279946.1        | 0.858                | copper amine oxidase |
|                                        | WP_014280075.1        | 0.685                | copper amine oxidase |
|                                        | WP_014280130.1        | 0.432                | copper amine oxidase |
|                                        | WP_014280165.1        | 0.616                | copper amine oxidase |
|                                        | WP_014280193.1        | 0.787                | copper amine oxidase |
|                                        | WP_014280782.1        | 0.672                | copper amine oxidase |
|                                        | WP_014281017.1        | 0.724                | copper amine oxidase |
|                                        | WP_014282346.1        | 0.651                | copper amine oxidase |
|                                        | WP_014282566.1        | 0.557                | copper amine oxidase |
|                                        | WP_014282725.1        | 0.698                | copper amine oxidase |
|                                        | WP_043922553.1        | 0.829                | copper amine oxidase |
| WP_043922806.1                         | 0.799                 | copper amine oxidase |                      |
